# Supplementary material
Source: MDPI journal article supplement (https://www.mdpi.com/2073-4395/12/9/2009)
Supplement: s1 [file s1]

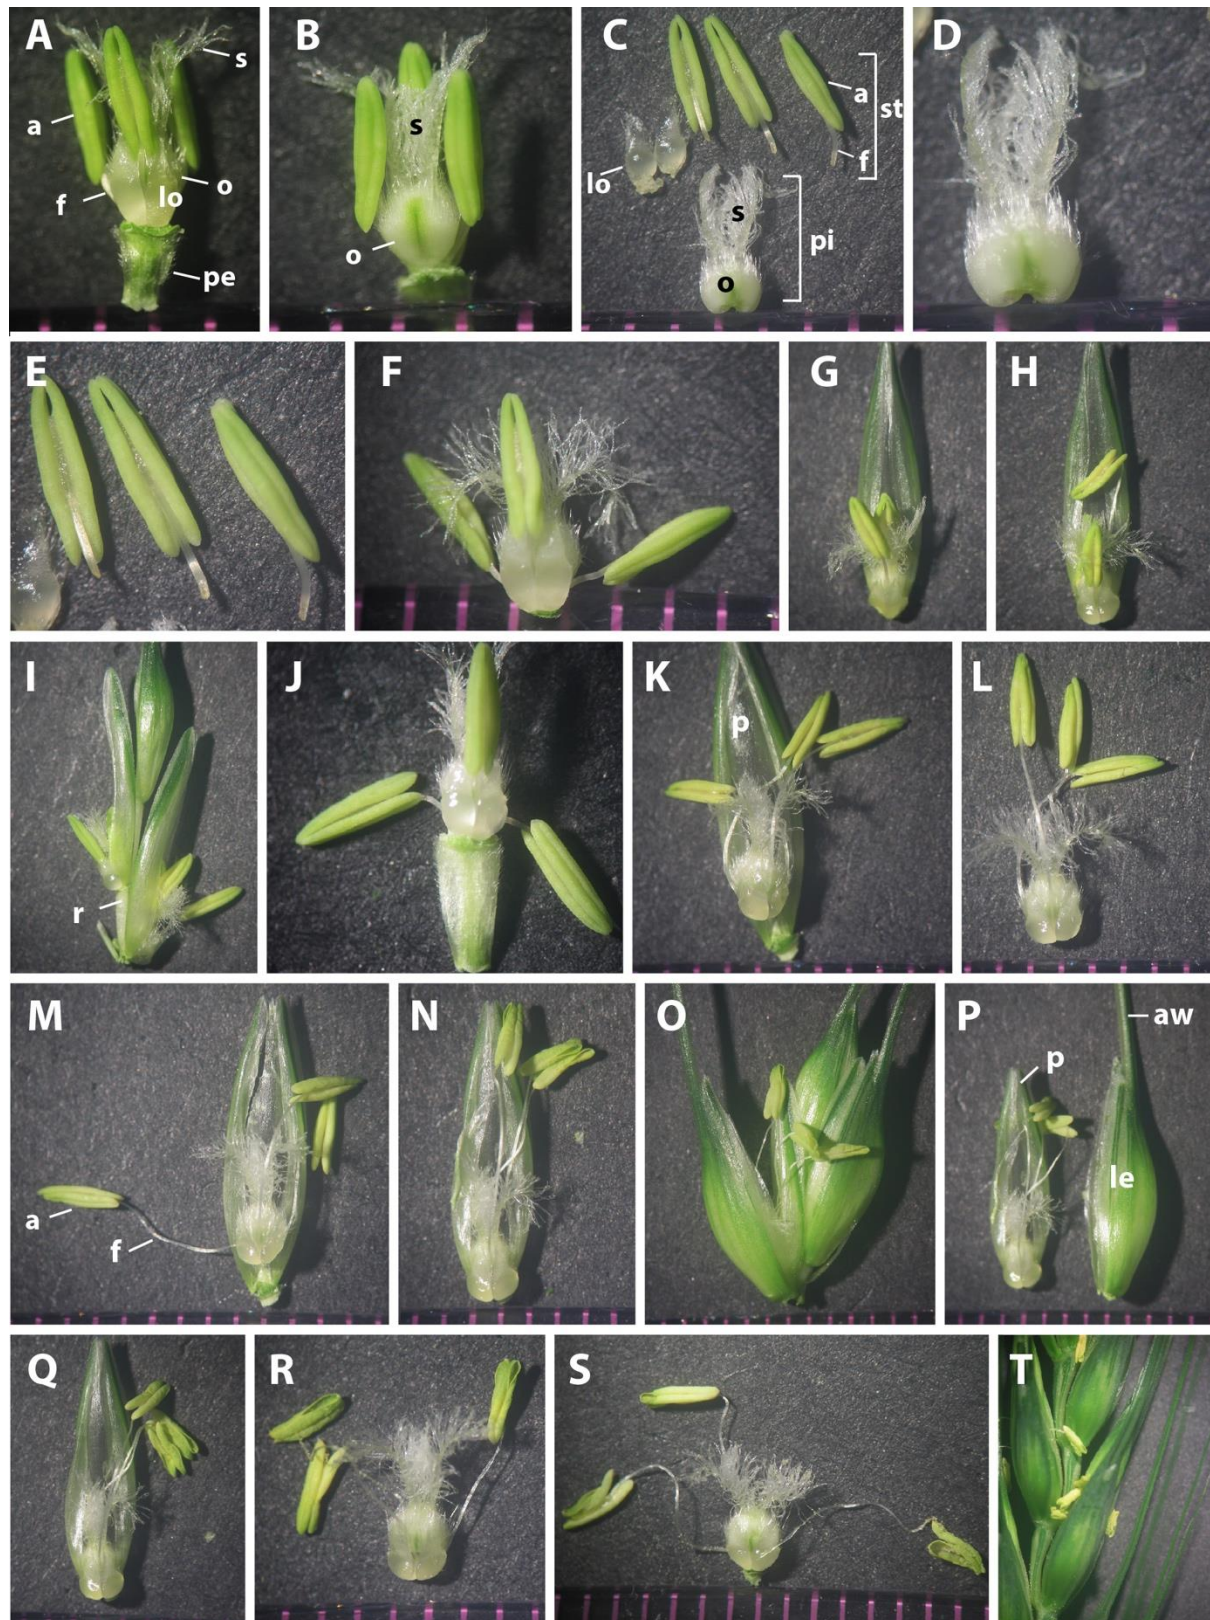

**Supplementary Figure S1.** Developmental changes of wheat floret at pre-anthesis, anthesis and post-anthesis stages. (A-I) Pre-anthesis stage showing the reproductive organs (anthers and pistils), (J-M) anthesis stage showing yellowish anthers and fully receptive stigma, (N-T) post anthesis stage showing dehiscent anthers. Abbreviations: a, anther; aw, awn; f, filament; le, lemma; lo, lodicule; o, ovary; p, palea; pi, pistil; r, rachilla; s, stigma; st, stamen. Ruler divisions = 1.0 mm.

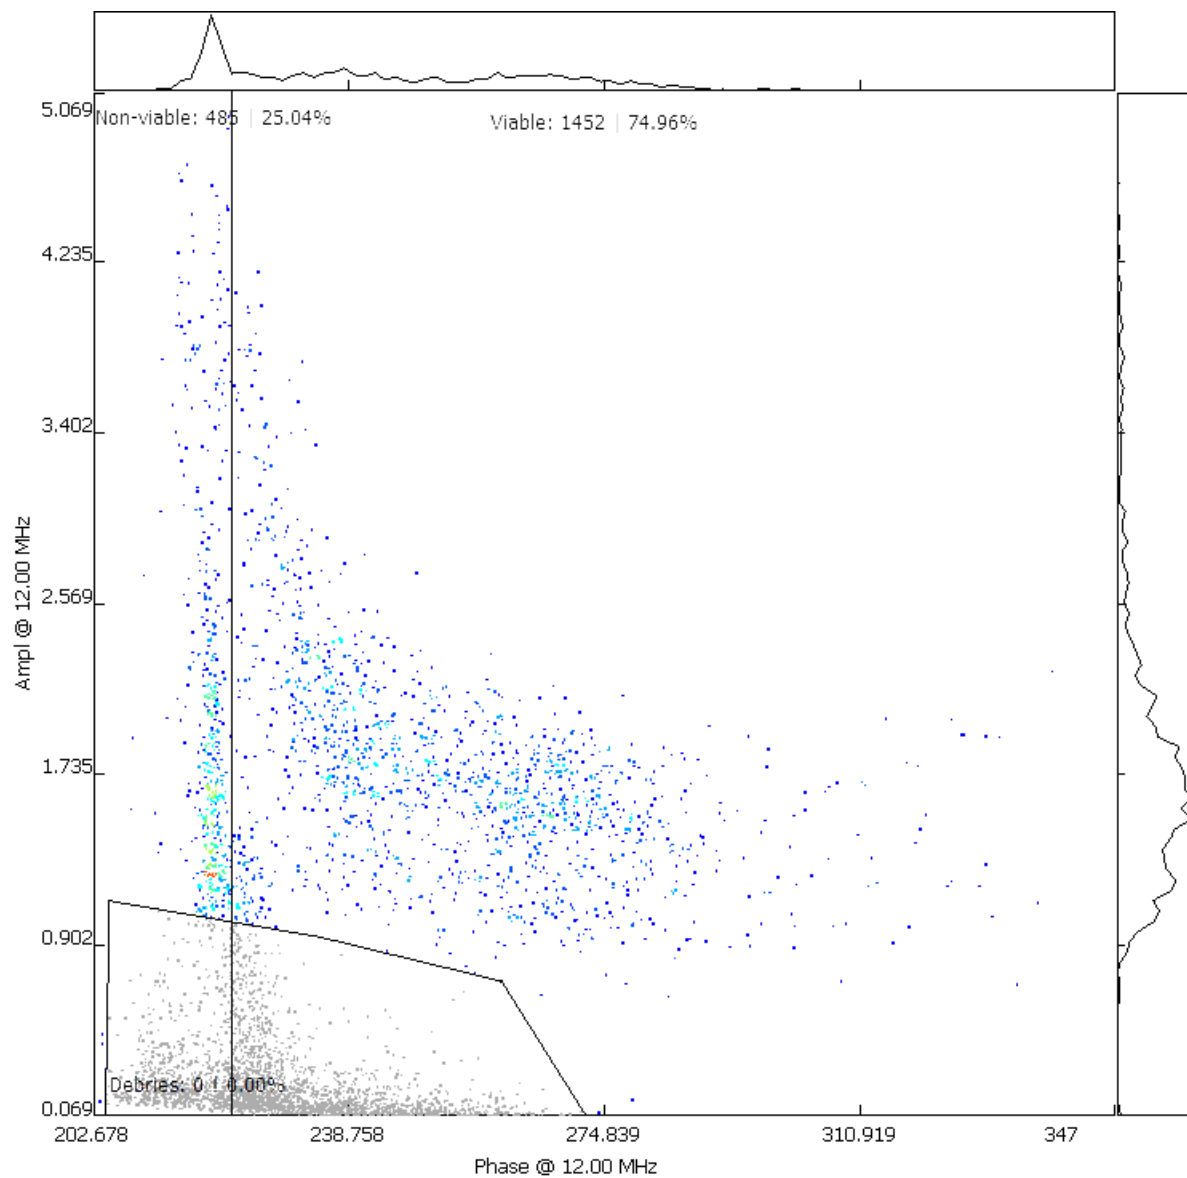

**Supplementary Figure S2.** Ampha cytometer chart at 12.00 MHz for categories of cell count using mature pollen grains of the genotype P1 638537 (*Yr36*).
